# Supplementary material for: Prognostic impact of recurrences of ventricular tachyarrhythmias and appropriate ICD therapies in a high-risk ICD population
Source: Springer Nature journal article supplement (doi:10.1007/s00392-019-01416-y), 2019-02-12
Supplement: MOESM1 [file 16465612]

| **Supplemental table 1. Characteristics of patients with s-ICD.** | | | | | | | | | | | |
| --- | --- | --- | --- | --- | --- | --- | --- | --- | --- | --- | --- |
|  | | **Analysis of recurrence** | | | | | **Analysis of appropriate ICD therapies** | | | | |
| **Characteristic** | **non-recurrence**  **(n=8; 62%** | | | **Recurrence**  **(n=5; 38%)** | | **P value** | **non-ICD therapy**  **(n=9; 69%** | | **ICD therapy**  **(n=4; 31%)** | | **P value** |
| **Age**, median (range) | 52 (25-77) | | | 60 (28-76) | | 0.560 | 52 (25-77) | | 55 (28-76) | | 0.930 |
| **Male gender,** n (%) | 7 | | (88) | 3 | (60) | 0.252 | 8 | (89) | 2 | (50) | 0.125 |
| **Tachyarrhythmia at index**, n (%) |  | |  |  |  |  |  | |  | |  |
| Ventricular tachycardia | 5 | | (63) | 2 | (40) | 0.429 | 6 | (67) | 1 | (25) | 0.164 |
| Ventricular fibrillation | 3 | | (38) | 3 | (60) | 3 | (33) | 3 | (75) |
| **Cardiovascular risk factors,** n (%) |  | |  |  |  |  |  | |  | |  |
| Arterial hypertension | 4 | | (50) | 2 | (40) | 1.000 | 5 | (56) | 1 | (25) | 0.559 |
| Diabetes mellitus | 2 | | (25) | 1 | (20) | 1.000 | 3 | (33) | 0 | (0) | 0.497 |
| Hyperlipidemia | 3 | | (38) | 1 | (20) | 1.000 | 3 | (33) | 1 | (25) | 1.000 |
| Smoking | 4 | | (50) | 2 | (40) | 1.000 | 5 | (56) | 1 | (25) | 0.308 |
| Cardiac family history | 1 | | (13) | 0 | (0) | 1.000 | 1 | (11) | 0 | (0) | 1.000 |
| **Comorbidities at index,** n (%) |  | |  |  |  |  |  | |  | |  |
| Coronary artery disease | 3 | | (38) | 3 | (60) | 0.592 | 4 | (44) | 2 | (50) | 1.000 |
| Atrial fibrillation | 3 | | (38) | 2 | (40) | 1.000 | 4 | (44) | 1 | (25) | 1.000 |
| Acute myocardial infarction | 2 | | (25) | 0 | (0) | 0.478 | 2 | (22) | 0 | (0) | 0.305 |
| Cardiogenic shock | 0 | | (0) | 1 | (20) | 0.385 | 0 | (0) | 1 | (25) | 0.308 |
| CPR | 2 | | (25) | 3 | (60) | 1.000 | 2 | (22) | 3 | (75) | 0.217 |
| Out-of hospital | 2 | | (25) | 1 | (20) | 1.000 | 2 | (22) | 1 | (25) | 1.000 |
| In hospital | 0 | | (0) | 2 | (40) | 0.182 | 0 | (0) | 2 | (50) | 0.077 |
| Non-ischemic cardiomyopathy | 2 | | (25) | 0 | (0) | 0.487 | 2 | (22) | 0 | (0) | 1.000 |
| Chronic kidney disease | 3 | | (40) | 4 | (80) | 0.266 | 4 | (44) | 3 | (75) | 0.559 |
| **Medication at discharge**, n (%) |  | |  |  |  |  |  | |  | |  |
| Beta-blocker | 7 | | (88) | 4 | (80) | 0.715 | 8 | (89) | 3 | (75) | 1.000 |
| ACE-inhibitor | 7 | | (88) | 3 | (60) | 0.252 | 8 | (89) | 2 | (50) | 0.203 |
| ARB | 0 | | (0) | 1 | (20) | 0.385 | 0 | (0) | 1 | (25) | 0.308 |
| Adosterone antagonist | 1 | | (13) | 1 | (20) | 1.000 | 1 | (11) | 1 | (25) | 1.000 |
| Amiodarone | 1 | | (13) | 0 | (0) | 1.000 | 1 | (11) | 1 | (25) | 1.000 |
| **ECG intervals,** (mean ± SEM) |  | |  |  |  |  |  | |  | |  |
| PQ | 160 ± 0 | | | 160 ± 0 | | 1.000 | 160 ± 0 | | 160 ± 0 | | 1.000 |
| QRS | 95 ± 15 | | | 130 ± 0 | | 0.407 | 95 ± 15 | | 130 ± 0 | | 1.000 |
| QT | 400 ± 0 | | | 497 ± 0 | | 1.000 | 400 ± 0 | | 497 ± 0 | | 0.407 |
| **LVEF, n (%)** |  | |  |  |  |  |  | |  | |  |
| ≥ 55% | 1 | | (17) | 1 | (50) | 0.587 | 1 | (14) | 1 | (100) | 0.180 |
| 54-45 | 1 | | (17) | 0 | (0) | 1 | (14) | 0 | (0) |
| 44-35% | - | | - | - | - | - | - | - | - |
| <35% | 4 | | (67) | 1 | (50) | 5 | (71) | 0 | (0) |
| Not documented | 2 | | - | 3 | - |  |  |  |  |  |  |
| **Electrical therapies at index, n (%)** |  | |  |  |  |  |  | |  | |  |
| Electrophysiological examination | 2 | | (25) | 2 | (40) | 1.000 | 2 | (22) | 2 | (50) | 0.530 |
| Ablation therapy | 0 | | (0) | 0 | (0) | - | 0 | (0) | 0 | (0) | - |
| **Implant indication, n (%)** |  | |  |  |  |  |  | |  | |  |
| Primary prevention | 5 | | (63) | 3 | (60) | 1.000 | 6 | (67) | 2 | (50) | 1.000 |
| Secondary prevention | 3 | | (38) | 2 | (40) | 3 | (33) | 2 | (50) |
| **ICD programming, bpm, median (IQR)** |  | |  |  |  |  |  | |  | |  |
| VT detection threshold | 220 (200-235) | | | 200 (185-210) | | 0.264 | 220 (200-220) | | 170 (170-200) | | 0.264 |
| VF detection threshold | 250 (240-250) | | | 250 (145-250) | | 0.809 | 230 (230-250) | | 240 (240-250) | | 0.809 |
| **All-cause mortality, at 5 years, n (%)** | 1 | | (13) | 1 | (20) | 1.000 | 2 | (22) | 0 | (0) | 1.000 |
| **First rehospitalization, n (%)** |  | |  |  |  |  |  | |  | |  |
| Overall | 0 | | (0) | 2 | (40) | 0.128 | 0 | (0) | 2 | (50) | 0.077 |
| Ventricular tachycardia | 0 | | (0) | 2 | (40) | 0.128 | 0 | (0) | 2 | (50) | 0.077 |
| Ventricular fibrillation | 0 | | (0) | 0 | (0) | - | 0 | (0) | 0 | (0) | - |
| Acute myocardial infarction | 0 | | (0) | 0 | (0) | - | 0 | (0) | 0 | (0) | - |
| Acute heart failure | 0 | | (0) | 0 | (0) | - | 0 | (0) | 0 | (0) | - |
| Inappropriate device therapy | 0 | | (0) | 0 | (0) | - | 0 | (0) | 0 | (0) | - |
| Other | 0 | | (0) | 0 | (0) | - | 0 | (0) | 0 | (0) | - |
| ACE, angiotensin converting enzyme; ARB, angiotensin II receptor blocker; CPR, cardiopulmonary resuscitation; s-ICD, subcutaneous implantable cardioverter- defibrillator. | | | | | | | | | | | |
